# Supplementary material for: Spirituality and Wellness in Plastic Surgery: A Survey of ASPS Members
Source: PubMed Central journal article supplement — Plast Reconstr Surg Glob Open. 2021 Oct 7;9(10):e3853. doi: 10.1097/GOX.0000000000003853 (PMC8500563; doi:10.1097/gox.0000000000003853), 2021-10-07
Supplement: gox-9-e3853-s001.pdf [file gox-9-e3853-s001.pdf]

## 2020 - Well-being and Spirituality in Plastic Surgery

| ASPS Practice Type                                                | Survey Population |     |     | Survey Responders |     |     | Survey non responders |     |     |
|-------------------------------------------------------------------|-------------------|-----|-----|-------------------|-----|-----|-----------------------|-----|-----|
| Academic                                                          | 303               | 13% | 16% | 42                | 14% | 18% | 261                   | 13% | 15% |
| Academic Practice (salaried with private practice)                | 55                | 2%  |     | 10                | 3%  |     | 45                    | 2%  |     |
| Employed Physician                                                | 134               | 6%  | 6%  | 18                | 6%  | 6%  | 116                   | 6%  | 6%  |
| Solo                                                              | 825               | 36% | 42% | 99                | 34% | 38% | 726                   | 37% | 42% |
| Solo practice-shared facility                                     | 124               | 5%  |     | 12                | 4%  |     | 112                   | 6%  |     |
| Large multi-specialty group practice (more than 20 physicians)    | 146               | 6%  | 28% | 20                | 7%  | 28% | 126                   | 6%  | 28% |
| Large plastic surgery group practice (6 or more plastic surgeons) | 70                | 3%  |     | 9                 | 3%  |     | 61                    | 3%  |     |
| Small plastic surgery group practice (2-5 plastic surgeons)       | 377               | 17% |     | 45                | 15% |     | 332                   | 17% |     |
| Medium multi-specialty group practice (6-20 physicians)           | 37                | 2%  |     | 8                 | 3%  |     | 29                    | 1%  |     |
| Resident/Fellow                                                   | 183               | 8%  | 8%  | 25                | 9%  | 9%  | 158                   | 8%  | 8%  |
| Military                                                          | 26                | 1%  | 1%  | 3                 | 1%  | 1%  | 23                    | 1%  | 1%  |

| ASPS Practice Demographic         | Survey Population |     | Survey Responders |     | Survey non responders |     |
|-----------------------------------|-------------------|-----|-------------------|-----|-----------------------|-----|
| 50% Reconstructive & 50% Cosmetic | 487               | 22% | 56                | 20% | 431                   | 23% |
| 25% Reconstructive & 75% Cosmetic | 390               | 18% | 58                | 21% | 332                   | 17% |
| 75% Reconstructive & 25% Cosmetic | 641               | 29% | 69                | 25% | 572                   | 30% |
| 100% Cosmetic                     | 370               | 17% | 40                | 14% | 330                   | 17% |
| 100% Reconstructive               | 297               | 14% | 54                | 19% | 243                   | 13% |

| ASPS Gender | Survey Population |     | Survey Responders |     | Survey non responders |     |
|-------------|-------------------|-----|-------------------|-----|-----------------------|-----|
| Female      | 844               | 25% | 136               | 32% | 708                   | 24% |
| Male        | 2521              | 75% | 290               | 68% | 2231                  | 76% |

| <b>ASPS Years In Practice</b> | <b>Survey Population</b> |     | <b>Survey Responders</b> |     | <b>Survey non responders</b> |     |
|-------------------------------|--------------------------|-----|--------------------------|-----|------------------------------|-----|
| Under 5                       | 315                      | 16% | 154                      | 36% | 161                          | 10% |
| 5 - 9                         | 318                      | 16% | 55                       | 13% | 263                          | 17% |
| 10 - 14                       | 301                      | 15% | 37                       | 9%  | 264                          | 17% |
| 15 - 19                       | 308                      | 15% | 31                       | 7%  | 277                          | 17% |
| 20 - 24                       | 260                      | 13% | 53                       | 12% | 207                          | 13% |
| 25 and over                   | 515                      | 26% | 100                      | 23% | 415                          | 26% |

After analyzing the characteristics of nonresponders, it is determined that the sample is representative of the survey population. Although our survey only has a 12.7% overall response rate, the characteristics of both groups are similar and the survey results are valid for ASPS members in general.
